# Supplementary material for: Rapid synthesis of supported single metal nanoparticles and effective removal of stabilizing ligands
Source: Royal Society of Chemistry journal article supplement (doi:10.1039/d1ta06032e), 2021-01-01
Supplement: d1ta06032e1.pdf [file d1ta06032e1.pdf]

## Electronic Supplementary Information

### Rapid synthesis of supported single metal nanoparticles and effective removal of stabilizing ligands

Panagiotis Trogadas<sup>†a</sup>, Nidhi Kapil<sup>†a</sup>, Gyen Ming A. Angel<sup>b</sup>, Stefanie Kühl<sup>§</sup>, Peter Strasser<sup>c</sup>, Dan J. L. Brett<sup>b</sup> and Marc-Olivier Coppens<sup>a</sup>

#### Author affiliations

\* Corresponding author, Email: p.trogadas@ucl.ac.uk

<sup>a</sup> EPSRC “Frontier Engineering” Centre for Nature Inspired Engineering, Department of Chemical Engineering, University College London, London, UK

<sup>b</sup> Electrochemical Innovation Lab, Department of Chemical Engineering, University College London, London, UK

<sup>c</sup> The Electrochemical Energy, Catalysis and Materials Science Laboratory, Department of Chemistry, Chemical Engineering Division, Technical University Berlin, Germany

<sup>§</sup> Present address: Department of Interface Science, Fritz-Haber-Institute of the Max-Planck Society, Berlin, Germany

<sup>†</sup> Both authors contributed equally

#### S1. Experimental section

**S1.1 Chemicals.** Silver nitrate ( $\text{AgNO}_3$ , 99.99% pure), gold trichloride acid ( $\text{HAuCl}_4 \cdot 3\text{H}_2\text{O}$ , 99.99% pure), dodecylamine (98% pure), formaldehyde (37% in water), isopropanol (anhydrous, 99.5% pure), and cyclohexane (99% pure), were purchased from Sigma Aldrich. Nozzles for electro spraying (0.007, 0.020, 0.030, 0.046 inch internal diameter) were purchased from Gilson Scientific. Chemical resistant tubing is purchased from Tygon (L60, 1/16 inch internal diameter). A coiled electrode ring (soldering alloy-Sn:Cu = 99.3:0.7) is purchased from Stannol. Graphene nanoplatelets (5  $\mu\text{m}$ , xGNP) and Vulcan carbon XC-72 were purchased from Sigma Aldrich and Cabot, respectively.

TS-1 was synthesized in-house, using a procedure reported in the literature.<sup>1</sup>

#### S1.2 Electro spraying setup.

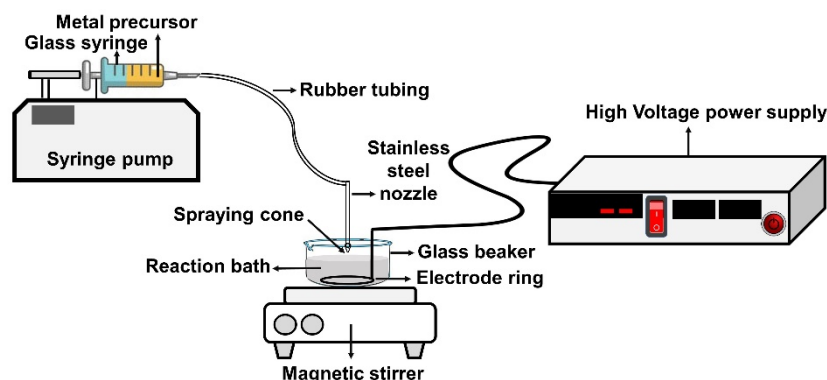

**Figure S 1.** Experimental set-up used for the synthesis of metal nanoparticles via electro spraying.

### **S1.3 Evaporation and calcination.**

10 mg of the chosen support is added to the produced metal nanoparticle solution (2 mL), which is vigorously stirred for 2 h at room temperature to ensure that metal nanoparticles are adsorbed on the support. Then, a rotary evaporator (Buchi R-210 Rotavapor System) is utilized to dry the liquid solution (operating conditions: 60 °C, 200 mbar, 100 rpm).

All in-house synthesized supported metal nanoparticles are subjected to heating in a furnace (Carbolite Gero) under air at 350 °C for 3 h (1 °C min<sup>-1</sup> heating rate).

### **S1.4 Characterization.**

*Ultraviolet-visible spectroscopy (UV-vis).* Absorption spectra are measured using a Cary 4000 UV-vis spectrophotometer. Samples of metal precursor solutions are contained in quartz cuvettes (1 mL). A quartz cuvette is used as a sample holder for the synthesized metal precursor solutions. Data are corrected using the same solvent in the solution (cyclohexane) for background absorption.

*Transmission electron microscopy (TEM).* High-resolution TEM images are performed with a JEOL 2100 instrument operating at 200 kV. Samples are prepared by sonicating dilute dispersions in ethanol for 10 min, drop-casting these dispersions onto holey carbon-coated copper grids (EM resolutions), and drying them in air at room temperature prior to the TEM measurement. ImageJ software is used for the analysis of particle size.

*Thermogravimetric analysis (TGA).* TGA measurements are performed via a Mettler Toledo (TGA/DSC 3+) thermogravimetric analyzer. The samples are analyzed at a heating rate of 10°C min<sup>-1</sup> under air from room temperature until 800°C and maintained at 800°C for 2 h.

*Fourier transform infrared spectroscopy (FTIR).* FTIR spectrum is obtained via a Vertex 70 Bruker spectrometer between 400 and 4000 cm<sup>-1</sup> inverse wavelengths. The spectrometer is equipped with a Pike MIRacle™ Ge ATR crystal. The powder is directly deposited on the Ge crystal. Each spectrum is obtained by averaging 64 scans at 4 cm<sup>-1</sup> resolution.

*X-ray photoelectron spectroscopy (XPS).* The powder samples of uncalcined and calcined supported metal nanoparticles are dried in vacuum at 60°C overnight, prior to XPS measurements. A survey scan between 0 and 1200 eV is performed for each sample. Then, high-resolution scans (100 per element) for carbon and nitrogen are conducted with 20 eV pass energy. CasaXPS software is used for data processing.

**S1.5 Electrochemical measurements.** All electrochemical measurements are performed in an electrochemical cell with three compartments in 0.1 M KOH at room temperature. A RHE is used as the reference electrode, and a platinum mesh as the counter electrode. A glassy carbon disk is used as the working electrode. The supported metal nanoparticles are dispersed in DI water by sonication for 1 h and, then, 30-40 µL of the suspension is deposited with a pipet on the glassy carbon disk. A solution of Nafion (0.1 wt%, 15 µL) is added on top of the catalyst and dried in air. Cyclic voltammograms are recorded in nitrogen, saturated at 50 mV s<sup>-1</sup> scan rate. Linear sweep voltammograms are recorded in oxygen saturated electrolyte at 20 mV s<sup>-1</sup> and 400, 800, 1200, and 1600 rpm rotation speed.

## S2. TEM measurements

**Au nps solution      Ag nps solution**

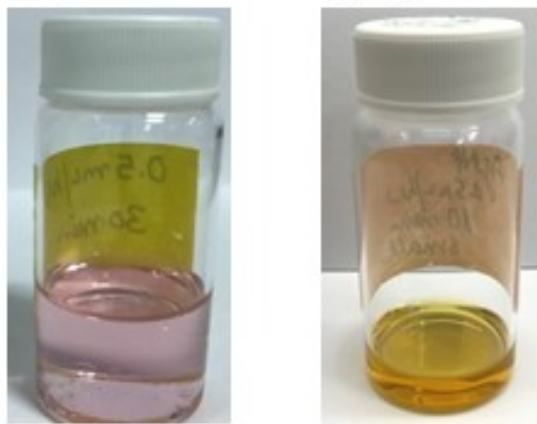

**Figure S 2.** Formation of Au and Ag nanoparticles after the completion of the electro spraying process.

**Table S 1.** Average size and standard deviation of synthesized Ag and Au nanoparticles using different spraying nozzles. Calculation is based on TEM measurements (200 counts).

| Nozzle diameter (inch) | Ag nanoparticles (nm) | Au nanoparticles (nm) |
|------------------------|-----------------------|-----------------------|
| 0.007                  | $1.8 \pm 0.2$         | $4.5 \pm 0.4$         |
| 0.020                  | $4.1 \pm 0.4$         | $4.8 \pm 0.3$         |
| 0.030                  | $4.6 \pm 0.5$         | $6.9 \pm 0.5$         |
| 0.046                  | $9.4 \pm 0.7$         | $8.5 \pm 0.6$         |

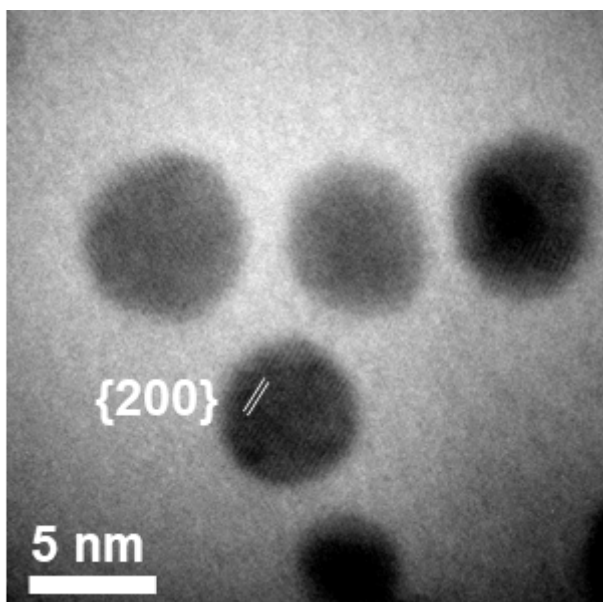

**Figure S 3.** High-resolution TEM of synthesized Au nanoparticles.

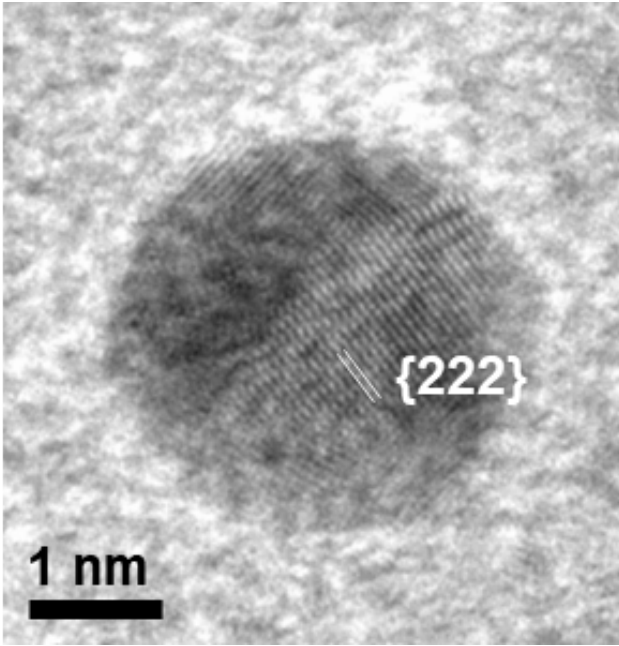

**Figure S 4.** High-resolution TEM of synthesized Ag nanoparticles.

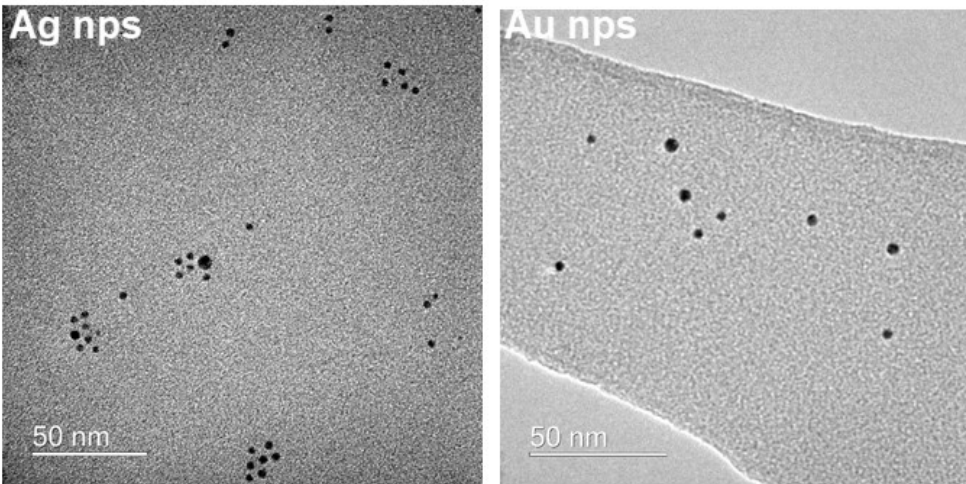

**Figure S 5.** TEM images of synthesized Ag and Au nanoparticle solutions after prolonged storage (8 months).

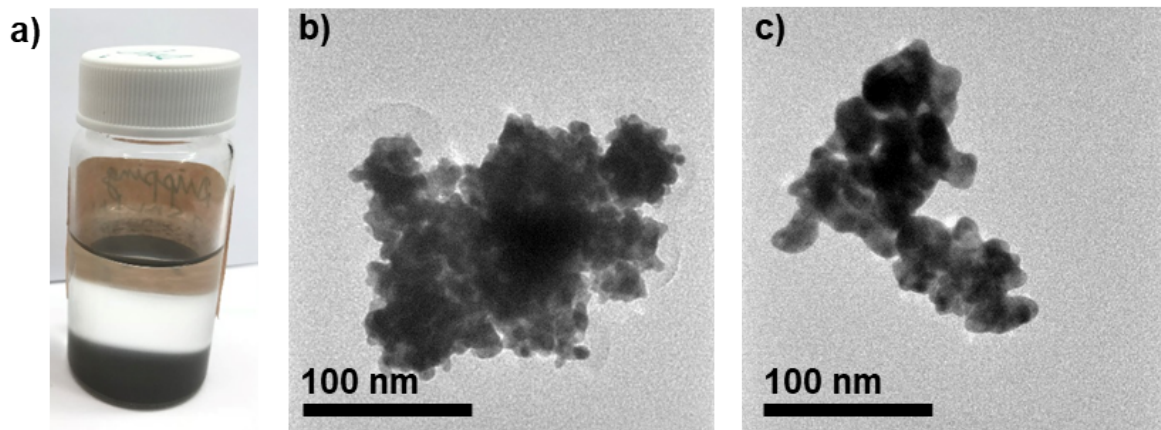

**Figure S 6.** Clusters of agglomerated metal nanoparticles are produced via dripping mode (i.e., 0 V applied potential): a) Vial showing agglomeration in this sample, b-c) TEM images of agglomerated particles in solution.

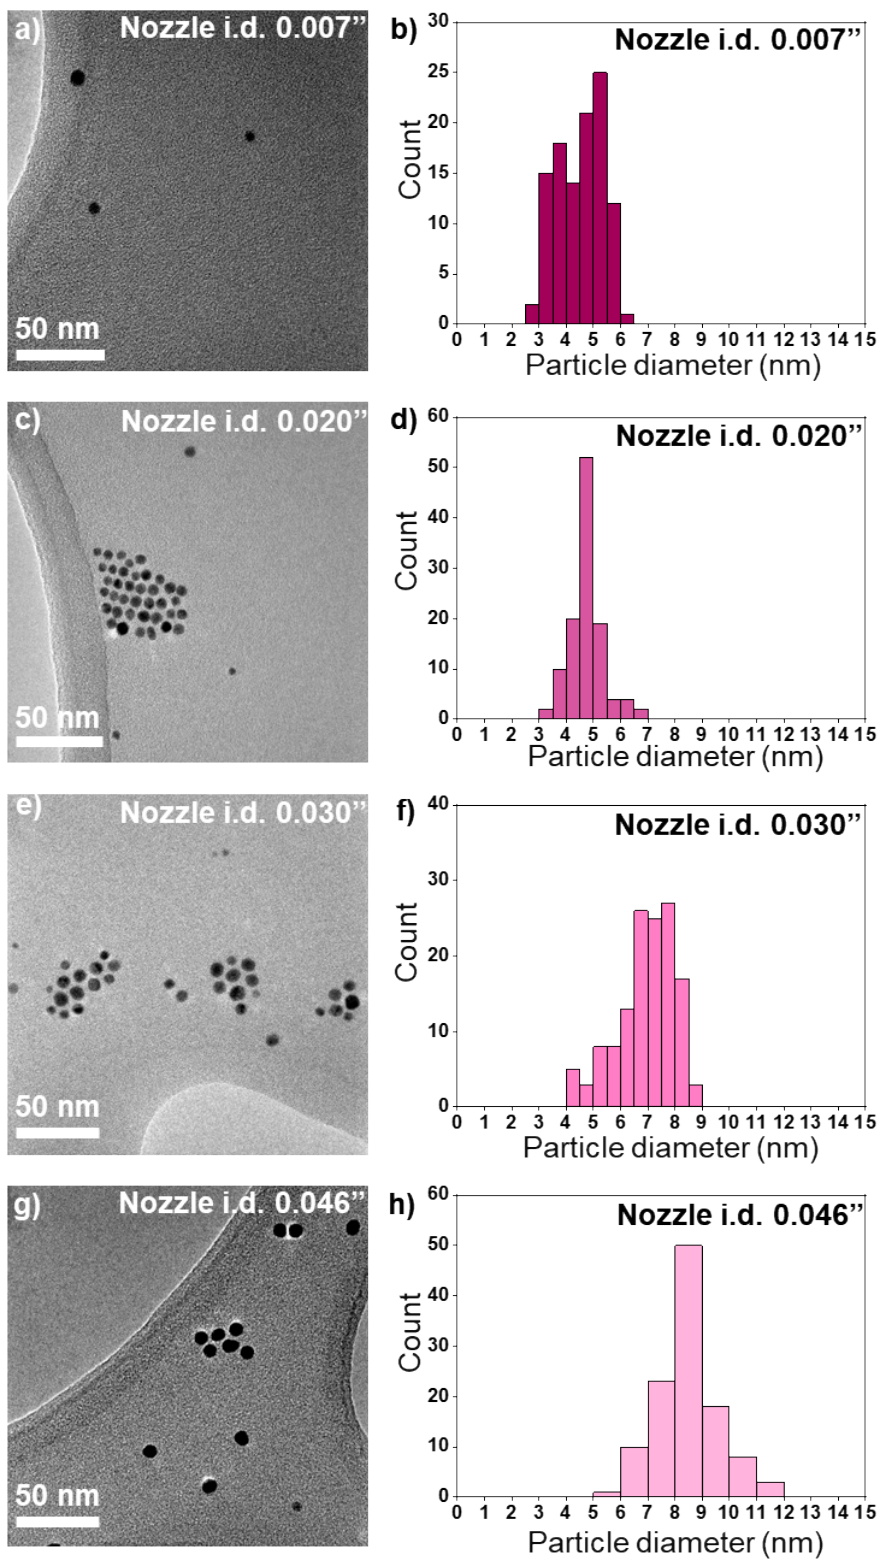

**Figure S 7.** TEM images and particle size distribution of Au nanoparticles via electrospaying, using different nozzles, as indicated.

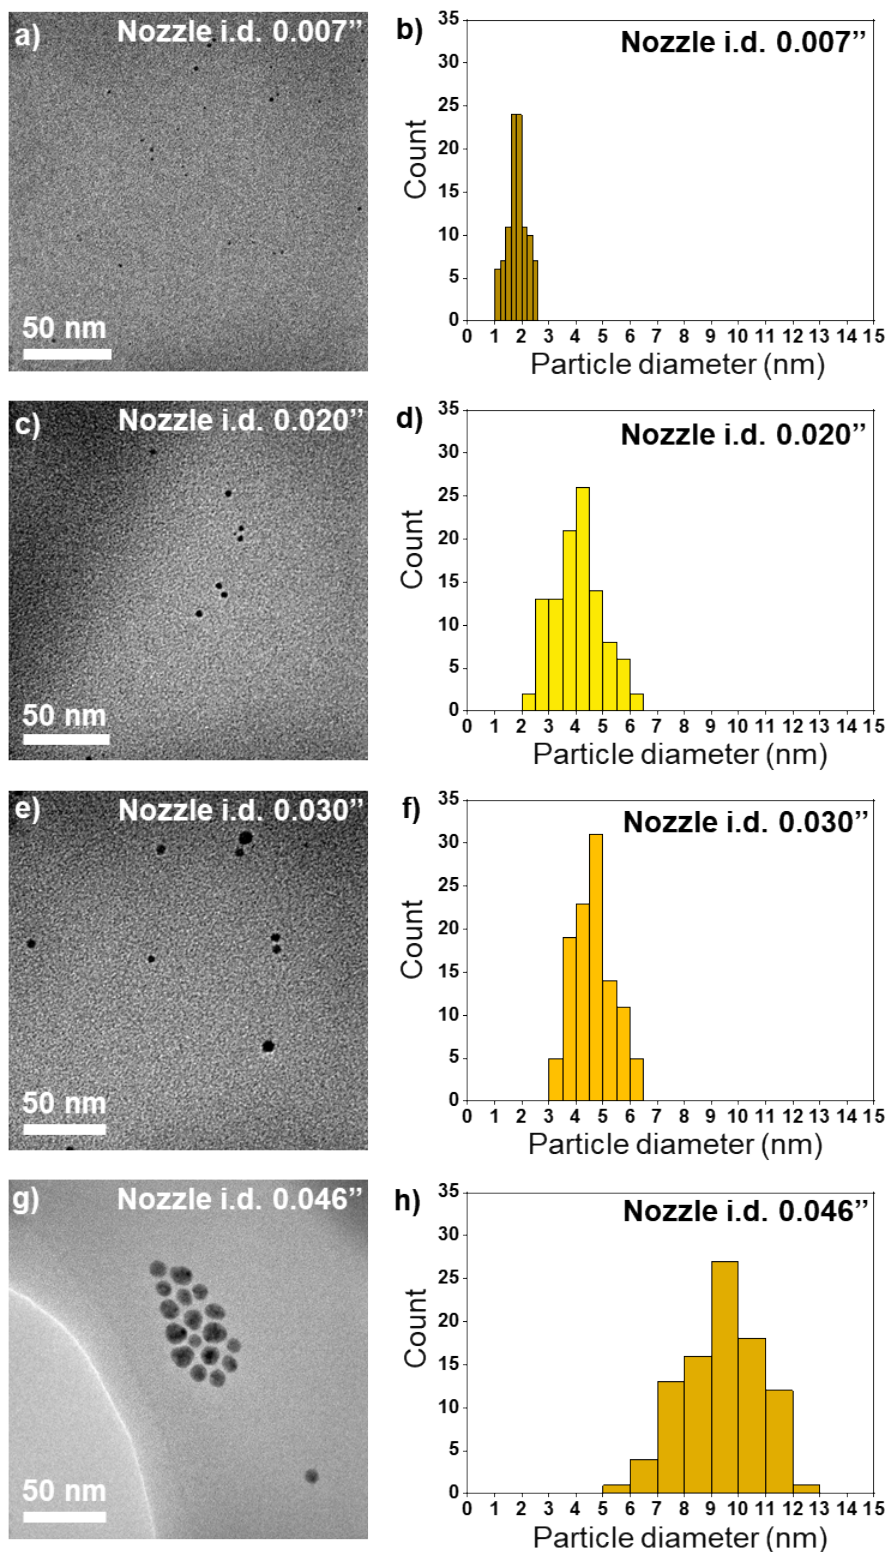

**Figure S 8.** TEM images and particle size distribution of Ag nanoparticles via electrospaying, using different nozzles, as indicated.

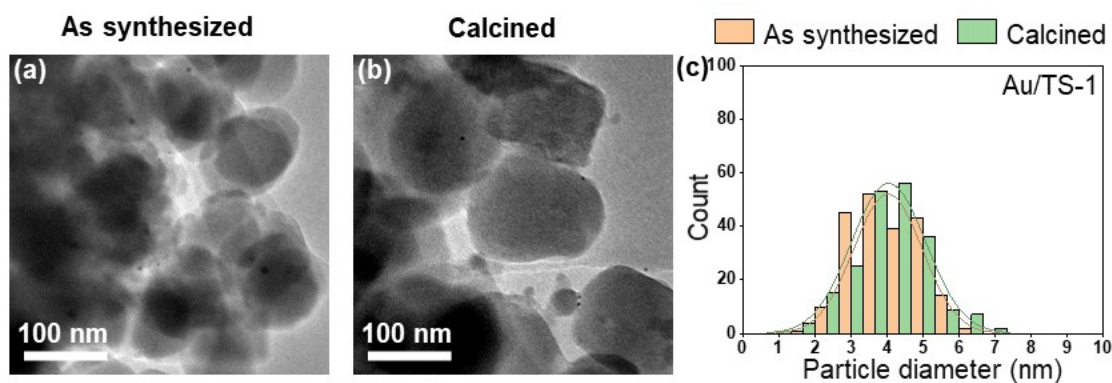

**Figure S 9.** TEM images of (a) as synthesized and (b) post calcination, Au nanoparticles supported on TS-1. (c) Corresponding particle size distributions.

**Table S 2.** Average size and standard deviation of synthesized Au supported on TS-1. Calculation is based on TEM measurements (200 counts).

| Nozzle diameter (inch) | Au nanoparticles (nm) |
|------------------------|-----------------------|
| 0.020                  | $4.0 \pm 1.0$         |



### S3. TGA measurements

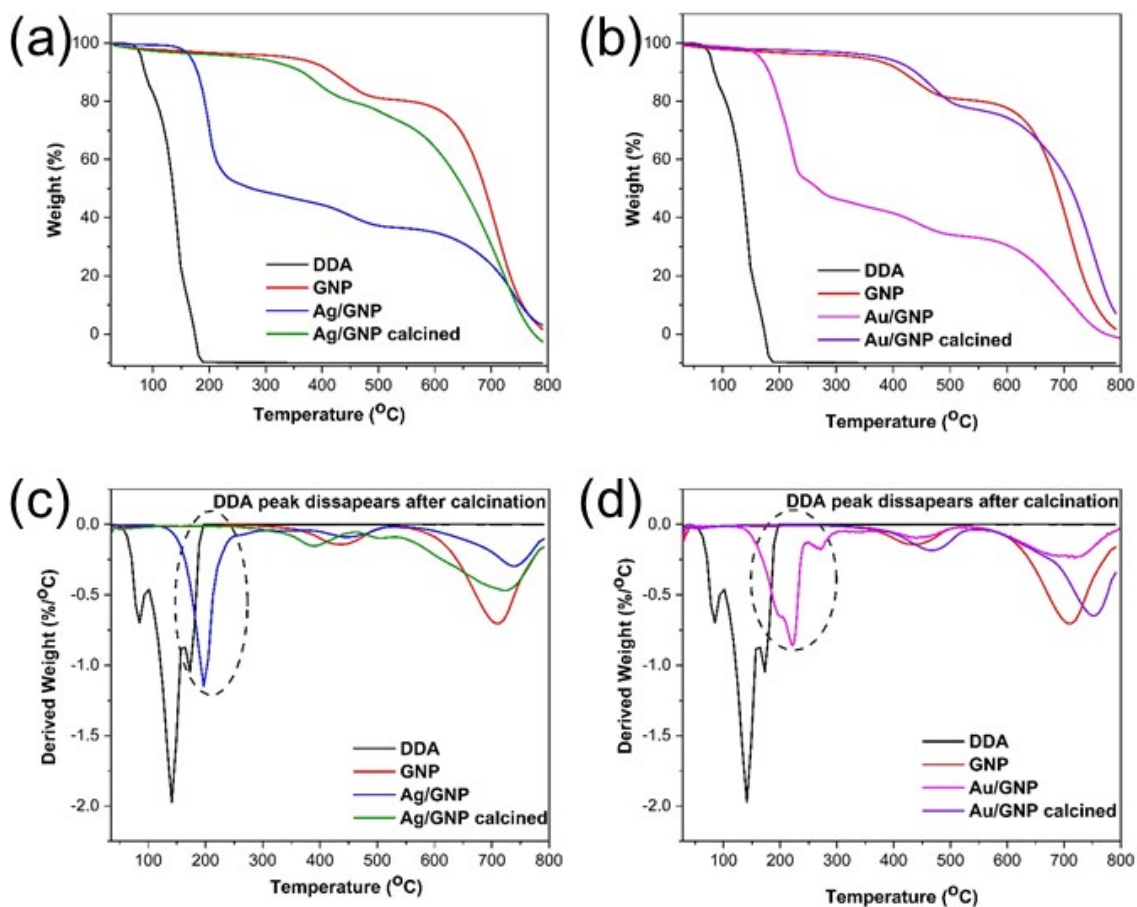

**Figure S 10.** TGA spectra of (a) Ag/GNP and (b) Au/GNP, indicating the required annealing temperature for the removal of DDA surfactant, which is confirmed by DTA analysis ((c) and (d)).

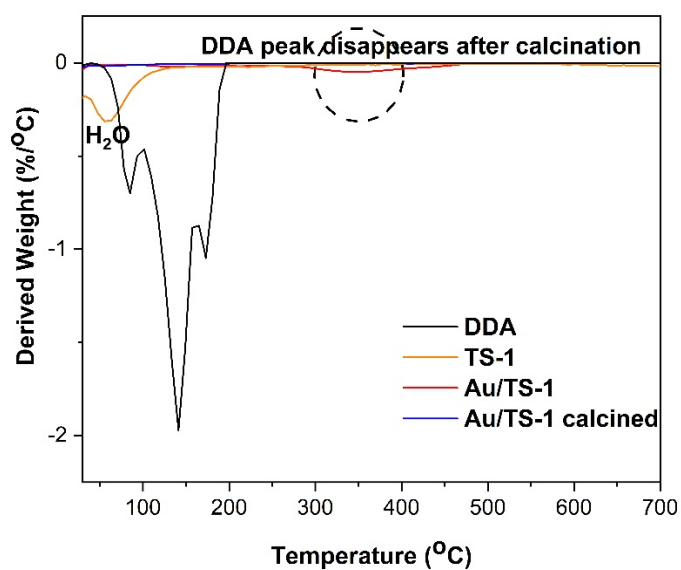

**Figure S 11.** DTA analysis of calcined Au/TS-1 confirms the removal of DDA surfactant. A similar result is obtained for Ag/TS-1.

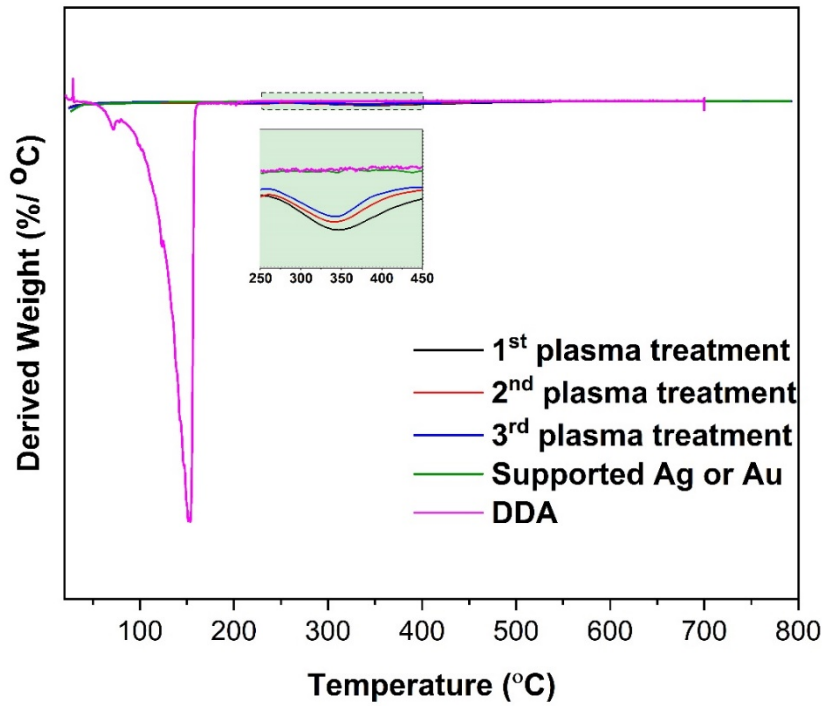

**Figure S 12.** DTA analysis of oxygen plasma-treated Ag or Au on Vulcan carbon, and GNP, showing that the DDA surfactant is not completely removed via this treatment.

#### S4. XPS measurements

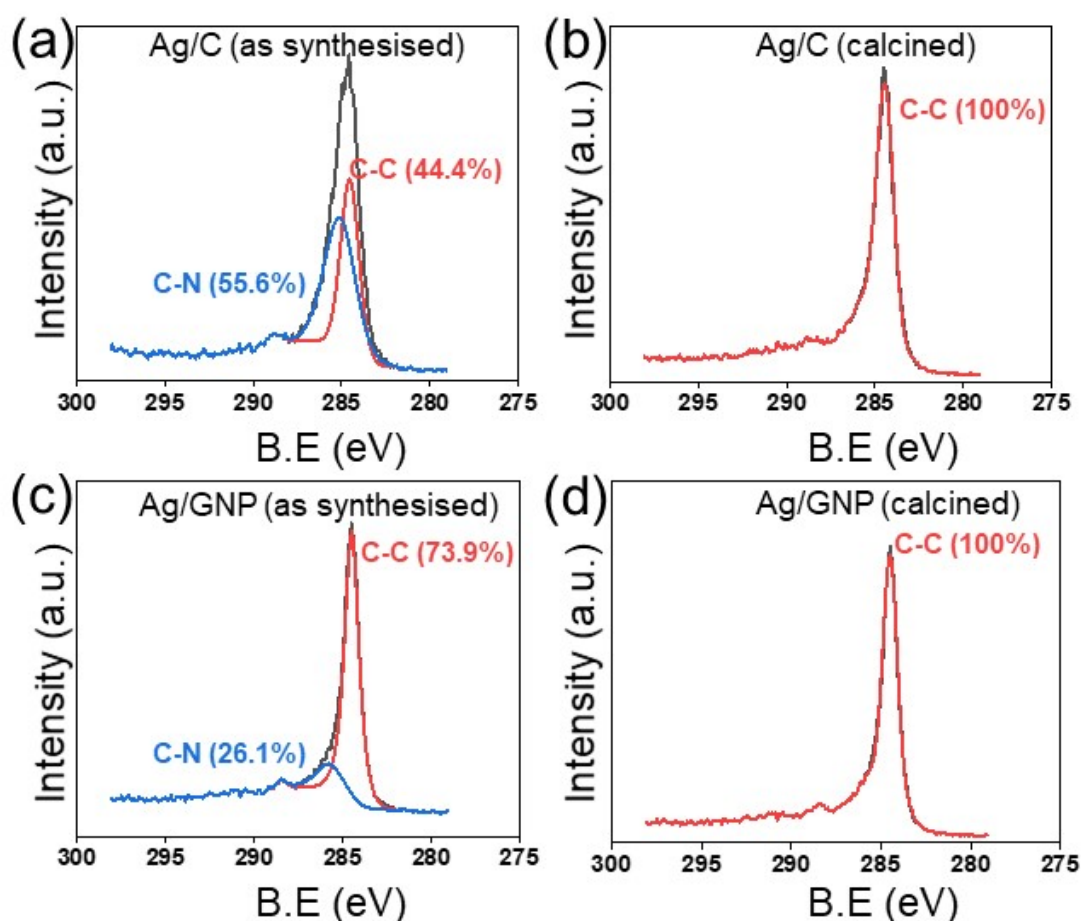

**Figure S 13.** C1s XPS spectra of uncalcined and calcined samples of supported Ag nanoparticles on Vulcan carbon ((a) and (b)), and graphene nanoplatelets ((c) and (d)).

#### S5. Activity

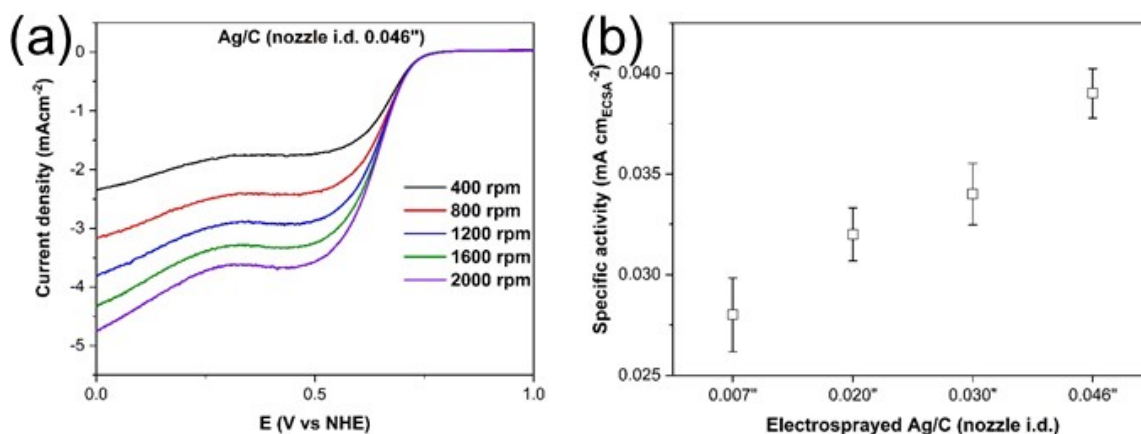

**Figure S 14.** (a) Linear sweep voltammograms (LSV) of Ag nanoparticles supported on Vulcan carbon (spraying nozzle i.d. 0.046"); (b) Specific activity of Ag supported on Vulcan carbon at 0.85 V (vs. RHE), for nanoparticles prepared with different internal diameters of the spraying nozzle.

## S6. High-speed camera measurements: Electrospaying

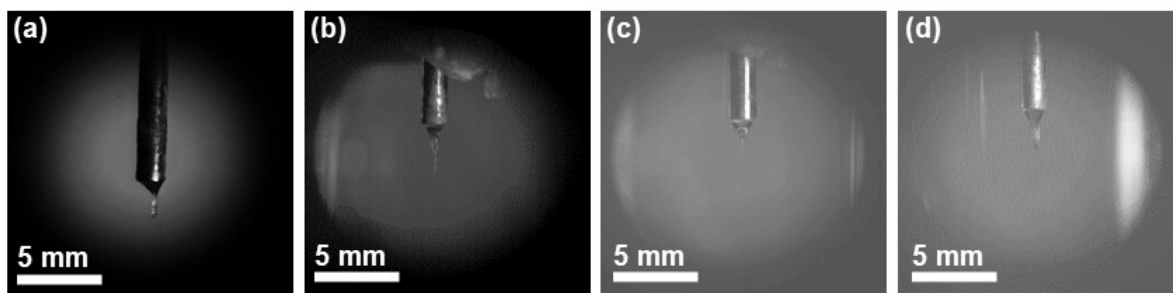

**Figure S 15.** Images of the Taylor cone recorded during the synthesis using different spraying nozzles; (a) 0.007", (b) 0.020", (c) 0.030", and (d) 0.046".

## S7. Schematic of DDA capped metal nanoparticles onto carbon support and its removal.

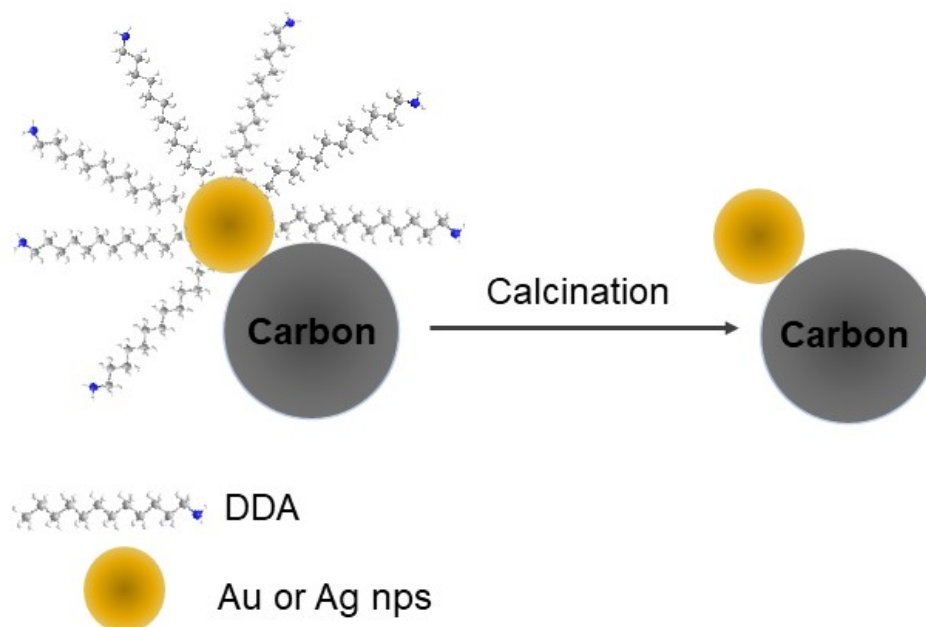

**Figure S 16.** Schematic of DDA capped metal nanoparticles onto carbon support and its removal.

## References

1. T.A. Nijhuis, B.J. Huizinga, M. Makkee and J.A. Moulijn, *Industrial & Engineering Chemistry Research*, **1999**, *38*, 884-891.
